# Supplementary material for: Comparison of two- and three-layer restacked Dion–Jacobson phase niobate nanosheets as catalysts for photochemical hydrogen evolution
Source: Royal Society of Chemistry journal article supplement (doi:10.1039/b903692j), 2009-01-01
Supplement: b903692j.pdf [file b903692j.pdf]

*Supplementary Material (ESI) for Journal of Materials Chemistry*  
*This journal is (C) The Royal Society of Chemistry 2009*

# Comparison of two- and three-layer restacked Dion-Jacobson phase niobate nanosheets as catalysts for photochemical hydrogen evolution

*Kazuhiko Maeda<sup>a,b</sup> and Thomas E. Mallouk<sup>a\*</sup>*

<sup>a</sup> Department of Chemistry, The Pennsylvania State University, University Park, Pennsylvania 16802,  
USA. <sup>b</sup> Research fellow of the Japan Society of Promotion Science (JSPS).

\* To whom corresponding author should be addressed.

Fax: +1-814-863-8403; Tel: +1-814-863-9637; E-mail: [tom@chem.psu.edu](mailto:tom@chem.psu.edu)

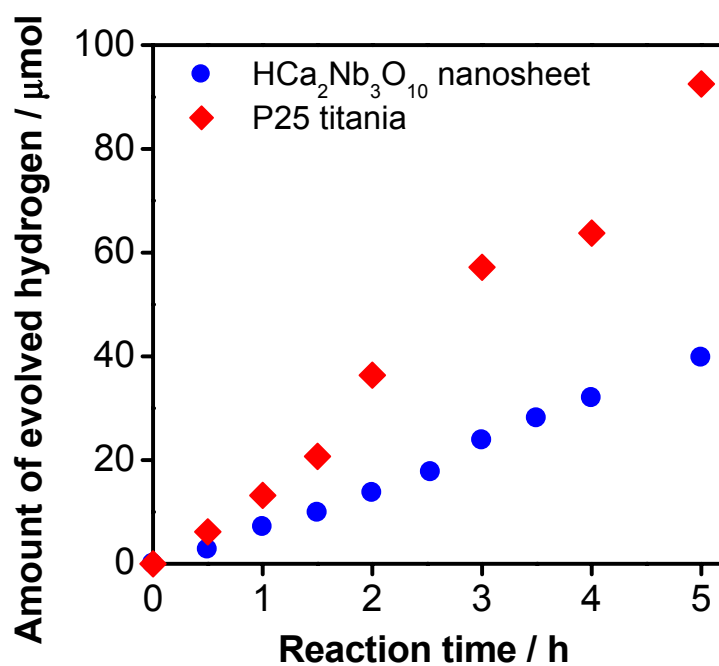

**Figure S1.** Time courses of H<sub>2</sub> evolution from 0.3 wt% Pt-loaded restacked HCa<sub>2</sub>Nb<sub>3</sub>O<sub>10</sub> nanosheets and P25 titania under UV irradiation ( $\lambda > 300$  nm). Reaction conditions: catalyst, 5.0 mg; aqueous methanol solution (0.1 M, 2.0 mL); light source, xenon lamp (300 W).

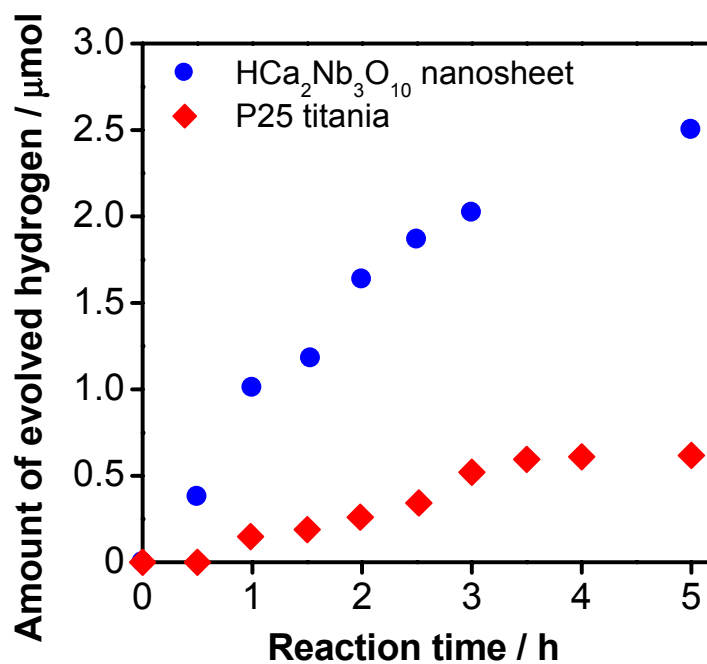

**Figure S2.** Time courses of H<sub>2</sub> evolution from 0.1 wt % Pt-loaded restacked HCa<sub>2</sub>Nb<sub>3</sub>O<sub>10</sub> nanosheets and P25 titania sensitized by tris(2,2'-bipyridyl)ruthenium(II) chloride (Ru<sup>2+</sup>) with visible light ( $\lambda > 420$  nm). Reaction conditions: catalyst, 5.0 mg; aqueous solution (2.0 mL) containing 0.01 M EDTA and 50  $\mu\text{M}$  Ru<sup>2+</sup>; light source, xenon lamp (300 W) with a cutoff filter.
